## CORRECTION

# Correction: Health behaviors, outcomes and their relationships among young men aged 18-24 years in a rural area of north India: A cross-sectional study

Sumit Malhotra, Shashi Kant, Farhad Ahamed, Ramashankar Rath, Mani Kaladivani, Sanjeev Kumar Gupta, S. Ramadass, Vineet Kumar Pathak, Abhishek Jaiswal, Raghavan Parthasarathy, Bhabani Prasad Acharya, Vignesh Dwarakanathan

The tenth author's name is incorrect. The correct name is Raghavan Parthasarathy.

## Reference

1. Malhotra S, Kant S, Ahamed F, Rath R, Kalaivani M, Gupta SK, et al. (2019) Health behaviors, outcomes and their relationships among young men aged 18-24 years in a rural area of north India: A cross-sectional study. PLoS ONE 14(7): e0220285. <https://doi.org/10.1371/journal.pone.0220285> PMID: [31348808](https://pubmed.ncbi.nlm.nih.gov/31348808/)

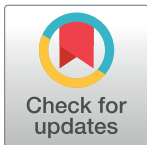

## OPEN ACCESS

**Citation:** Malhotra S, Kant S, Ahamed F, Rath R, Kaladivani M, Gupta SK, et al. (2019) Correction: Health behaviors, outcomes and their relationships among young men aged 18-24 years in a rural area of north India: A cross-sectional study. PLoS ONE 14(8): e0221493. <https://doi.org/10.1371/journal.pone.0221493>

**Published:** August 15, 2019

**Copyright:** © 2019 Malhotra et al. This is an open access article distributed under the terms of the [Creative Commons Attribution License](https://creativecommons.org/licenses/by/4.0/), which permits unrestricted use, distribution, and reproduction in any medium, provided the original author and source are credited.
